1 **Lrig3 restricts the size of the colon stem cell compartment**

2 Janelle G. Stevenson<sup>1</sup>, Ryan Sayegh<sup>2</sup>, Natalie Pedicino<sup>3</sup>, Natalie A. Pellitier<sup>4</sup>, Tim  
3 Wheeler<sup>1</sup>, Matthew E. Bechard<sup>6</sup>, Won Jae Huh<sup>5</sup>, Robert J. Coffey<sup>6,7,8,9</sup>, Anne E. Zemper<sup>1</sup>

4 <sup>1</sup>Department of Biology, Institute of Molecular Biology, University of Oregon, Eugene, OR  
5 97403

6 <sup>2</sup>Department of Molecular, Cellular, and Developmental Biology, University of Colorado,  
7 Boulder, CO, 80309

8 <sup>3</sup>Department of Molecular, Cellular, and Developmental Biology, University of California  
9 Santa Cruz, Santa Cruz, CA 95064

10 <sup>4</sup>Department of Medicine, Oregon Health and Science University, Portland, OR 97239

11 <sup>5</sup>Department of Pathology, Yale School of Medicine, New Haven, CT, USA

12 <sup>6</sup>Department of Medicine, Vanderbilt University Medical Center, Nashville, TN 37232

13 <sup>7</sup>Department of Cell and Developmental Biology, Vanderbilt University Medical Center,  
14 Nashville, TN 37232

15 <sup>8</sup>Epithelial Biology Center, Vanderbilt University Medical Center, Nashville, TN 37232

16 <sup>9</sup>Department of Veterans Affairs Medical Center, Nashville, TN 37232

17

18 \*Corresponding Author:  
19 Anne E. Zemper, PhD  
20 1229 University of Oregon  
21 1318 Franklin Avenue  
22 Room 273 Onyx Bridge  
23 Eugene, OR 97403  
24 Tel: 541-346-2403  
25 Fax: 541-346-4854  
26 E-mail: [anniez@uoregon.edu](mailto:anniez@uoregon.edu)

27

28

29 **Graphical Abstract**

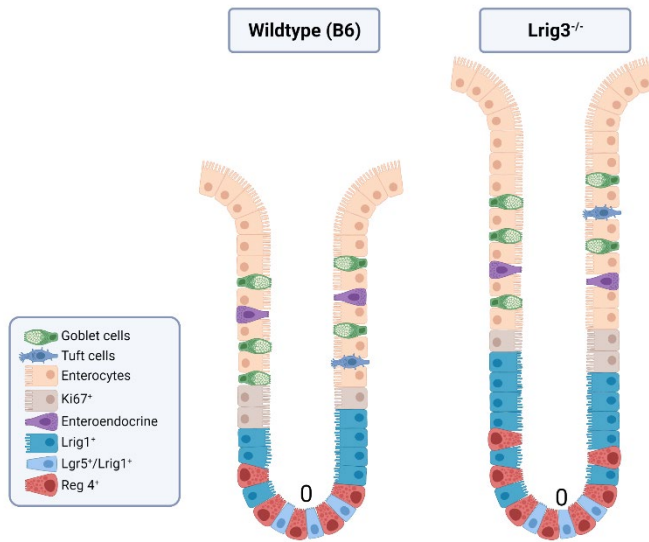

30

31 **Abstract**

32 The cellular census of the colonic crypt is tightly regulated, yet the molecular  
33 mechanisms that regulate this census are not fully understood. Lrig3, a transmembrane  
34 protein, is expressed in colonic crypt epithelial cells, including the stem, progenitor, and  
35 differentiated cell types. Mice missing Lrig3 have a disruption in their cellular census:  
36 using a novel *Lrig3*<sup>-/-</sup> mouse we demonstrate that *Lrig3*<sup>-/-</sup> mice have more cells per crypt,  
37 a greater mucosal area, and longer colons compared to wildtype mice, suggesting the  
38 expression of Lrig3 is required for both the total number of epithelial cells in the mouse  
39 colon, as well as colon length. In addition, we show *Lrig3*<sup>-/-</sup> mice have significantly more  
40 stem, progenitor, and deep crypt secretory cells, yet harbor a normal complement of  
41 enteroendocrine, Tuft, and absorptive cells. *Lrig3*<sup>-/-</sup> mice also have a concomitant  
42 decrease in phosphorylated Extracellular signal-related kinases, indicating the loss of  
43 Lrig3 leads to an expansion of the colonic stem cell compartment, in an Erk-dependent  
44 manner. Our study describes the expression of Lrig3 within the colon, defines



45 perturbations in mice lacking *Lrig3*, and supports a role for *Lrig3* in the establishment of  
46 both colonic crypt structure and cellular census, defined as the epithelial cell type and  
47 number in colon crypts.

## 48 **Introduction**

49         Precise spatiotemporal regulation of stem cell proliferation, differentiation, and  
50 apoptosis are critical for proper regeneration of the gastrointestinal epithelium. In the  
51 mouse colonic epithelium, the majority of cells are renewed every five days driven by  
52 stem cell division at the base of the colonic crypt (10). In order to maintain crypt size and  
53 epithelial cell number, the cellular census is tightly regulated by balancing the number of  
54 stem, progenitor, and differentiated cells per crypt. We know that each of these cell types  
55 are key for the absorptive and secretory jobs of the colon (13). Here, we evaluate how  
56 the loss of Leucine-rich repeats and immunoglobulin-like domains 3 (*Lrig3*) affects crypt  
57 cellular census and explore the impact of the loss of *Lrig3* on these three critical cell types.

58         *Lrig3* is a single-pass transmembrane protein and one of three members of the  
59 *Lrig* protein family (22). *Lrig* family members generally regulate both receptor tyrosine and  
60 serine/threonine kinases (22). To date, *Lrig3* hasn't been as extensively studied as the  
61 other *Lrig* family members, yet we know it is expressed across endo-, meso- and  
62 ectodermal tissue types throughout embryonic development (8). Disruptions in *Lrig3*  
63 affect proper neural crest formation in *Xenopus laevis* and result in incomplete formation  
64 of the murine lateral semicircular canal (2, 30). Generally, mice, sheep and pig are smaller  
65 if they have a loss-of-function in *Lrig3* (1, 11, 15). Only recently have contributions to  
66 primary literature uncovered mechanistic roles for *Lrig3* in the progression of many cancer

67 cell types: cervical, hepatocellular, prostate, glioblastoma and colon (5, 6, 12, 17, 23, 24,  
68 28).

69 While most adult vertebrates can survive and maintain some sort of  
70 homeostasis with the loss of *Lrig3*, there are a number of defects that have been  
71 described in knockout mice, including cardiac hypertrophy, misregulation of insulin levels  
72 and the misorganization of neurons in the central nervous system (7, 11). In certain  
73 tissues, *Lrig3* works in concert with another family member, *Lrig1* (7, 8). In the  
74 gastrointestinal tract, *Lrig1* is expressed on stem and progenitor cells in the small intestine  
75 and colon and is functionally important for maintaining homeostasis. The loss of *Lrig1*  
76 results in aberrant growth factor signaling and tumor formation (18, 25). From publicly-  
77 available expression databases, we know *Lrig3* is also highly expressed in the  
78 gastrointestinal tract (32) and *Lrig3* protein is predicted to have striking homology to *Lrig1*  
79 (22). These reasons led us to hypothesize that *Lrig3* is important for development and  
80 homeostasis of the mouse colon. The goal of our study was to understand the impact of  
81 the loss of *Lrig3* on colon biology. Through transcript and protein expression analysis, we  
82 show that *Lrig3* is present throughout the colonic crypt epithelium, and we describe  
83 multiple colon morphological and cellular defects in *Lrig3*<sup>-/-</sup> mice. Our study describes the  
84 expression of *Lrig3* within the colon, defines perturbations in mice lacking *Lrig3*, and  
85 supports a role for *Lrig3* in the establishment of both colonic crypt structure and cellular  
86 census, defined as the epithelial cell type and number in colon crypts.

## 87 **Results**

### 88 **Lrig3 expression in colonic crypts**

89 Our first step was to define *Lrig3* expression in the colonic crypts by assessing *Lrig3*  
90 transcript and *Lrig3* protein expression via *in situ* hybridization, immunofluorescence, and  
91 western blot analysis, respectively. We generated an *Lrig3* knockout mouse (*Lrig3*<sup>-/-</sup>, Fig.  
92 1A and Supplemental Fig. S1) to both serve as a control for these analyses and to  
93 evaluate the impact of the loss of *Lrig3*. Comparing wildtype (WT) tissue to *Lrig3*<sup>-/-</sup> tissue,  
94 we observed *Lrig3* transcript expression in all colonic epithelial cells and this expression  
95 was lost in the *Lrig3*<sup>-/-</sup> mice (Fig. 1B-E). Further, *Lrig3* protein is expressed in the majority  
96 of epithelial cells; this was confirmed by immunofluorescence and western blot analyses.  
97 *Lrig3* protein was absent in *Lrig3*<sup>-/-</sup> mice (Fig. 1F-J). These results define, for the first time,  
98 *Lrig3* expression in the mouse colonic crypt.

### 99 ***Lrig3*<sup>-/-</sup> mice have morphological and epithelial defects**

100 As our initial results demonstrate that *Lrig3* is highly expressed throughout the colonic  
101 crypt, we posited there may be epithelial disruption to the crypts in mice lacking *Lrig3*.  
102 Indeed, initial survey of the colonic tissues indicated morphological differences, as well  
103 as epithelial cellular census differences between WT and *Lrig3*<sup>-/-</sup> mice. To examine this  
104 directly, we first assessed colon lengths, and found that adult *Lrig3*<sup>-/-</sup> mice have  
105 significantly longer colons than WT mice at 6-10 weeks of age (p<0.05, Fig. 2A). We  
106 hypothesized that along with the observed increase in colon length there may be  
107 alterations at the cellular level. We examined this by measuring total mucosal area of WT  
108 and *Lrig3*<sup>-/-</sup> mice using hematoxylin and eosin stained, paraffin-embedded tissue sections  
109 and found that *Lrig3*<sup>-/-</sup> mice have a significantly larger mucosal area (p<0.01, Fig. 2B-D),  
110 per tissue section. The larger mucosal area in *Lrig3*<sup>-/-</sup> mice could be for several reasons,  
111 but we prioritized the investigation of two obvious hypotheses: 1) the epithelial cells within

112 *Lrig3*<sup>-/-</sup> mice are larger or 2) there are more cells present in the crypts of *Lrig3*<sup>-/-</sup> mice.  
113 After an extensive examination of the colon sections from both sets of mice, we  
114 determined there was no obvious difference in cellular size between the cohorts (data not  
115 shown), ruling out that hypothesis. To investigate our second hypothesis, we quantified  
116 the number of epithelial nuclei per crypt, across both cohorts, and found that *Lrig3*<sup>-/-</sup> mice  
117 have more cells per colonic crypt than the WT mice (p<0.05, Fig. 2E). While there could  
118 be many reasons for a greater number of cells, we first examined proliferation in the crypt  
119 of *Lrig3*<sup>-/-</sup> mice compared to WT mice by quantifying the expression of Ki67, a proliferative  
120 marker, in the epithelial cells. Surprisingly, we found no significant difference in the  
121 number of proliferating epithelial cells in the colonic crypts of *Lrig3*<sup>-/-</sup> mice at 6-10 weeks  
122 of age, compared to WT mice of the same age (Fig. 2F-J). From these analyses, we  
123 conclude that *Lrig3*<sup>-/-</sup> mice have a greater number of cells per crypt, but these cells are  
124 not undergoing aberrant proliferation.

### 125 **Colon crypt stem compartments are expanded in *Lrig3*<sup>-/-</sup> mice**

126 As epithelial cell number expansion is a hallmark of *Lrig3*<sup>-/-</sup> crypts, we wondered if this  
127 increased cell number was attributed to a particular region of the crypt. As there are many  
128 cell types present, we first assessed the stem and progenitor cells in the crypt-base by  
129 examining *Lgr5* expression, as this is indicative of the presence of long-lived proliferative  
130 stem cells in the base of the colonic crypt (4). First, we performed RNA Scope *in situ*  
131 hybridization for *Lgr5* expression and identified significantly more *Lgr5*<sup>+</sup> cells in the  
132 colonic crypts of *Lrig3*<sup>-/-</sup> mice (Fig. 3A-D). In addition, some cells seemed to harbor  
133 qualitatively more *Lgr5* than others, even in the WT tissue, consistent with previous  
134 analyses of stem and progenitor markers in the gut (10). To more carefully examine this

135 observation, we devised a quantification scheme for looking at *Lgr5* transcript expression  
136 levels in each cell. We binned them according to low- (<6 puncta per cell), mid- (6-14  
137 puncta per cell), and high ( $15 \leq$  puncta per cell) ranges (Fig. 3E). We quantified the puncta  
138 in *Lrig3*<sup>-/-</sup> and WT cells and while we observed no difference in the number of *Lgr5* low-  
139 expressing cells, there were significantly more mid- and high-expressing cells in *Lrig3*<sup>-/-</sup>  
140 mice ( $p < 0.001$ , Fig. 3F). The other cell type present in the stem cell region of the crypt is  
141 defined by the expression of the Reg4 protein. As Reg4<sup>+</sup> cells act as support cells for  
142 Lgr5<sup>+</sup> cells (20), we reasoned that we may also observe a parallel increase in Reg4<sup>+</sup>  
143 cells, in *Lrig3*<sup>-/-</sup> mice. To determine this, we quantified the number of Reg4<sup>+</sup> cells and  
144 found significantly more Reg4<sup>+</sup> cells in the base of the crypt ( $p < 0.0001$ , Fig. 3G-K). Reg4  
145 is also expressed by secretory cells near the top of the crypt, thus we quantified the  
146 number of Reg4<sup>+</sup> cells in the upper half of the crypt and determined there is no change  
147 in the number of these cells between *Lrig3*<sup>-/-</sup> and WT mice (Fig. 3L). Finally, we examined  
148 the number of Vil-1<sup>+</sup> (absorptive), Dclk1<sup>+</sup> (Tuft), and ChgA<sup>+</sup> (enteroendocrine) cells,  
149 which correspond to three additional differentiated cell types found in the upper portion of  
150 the crypts. Qualitatively, we found no obvious difference in Vil-1 expression, when  
151 comparing approximately 50 images per genotype. Quantitatively, we found no difference  
152 in Dclk1<sup>+</sup> and ChgA<sup>+</sup> cells when comparing *Lrig3*<sup>-/-</sup> and WT mice (Supplemental Fig. S2).  
153 Collectively, our results demonstrate the increased cell number we observe in *Lrig3*<sup>-/-</sup> mice  
154 is restricted to stem and support cells in the crypt base.

### 155 ***Lrig3*<sup>-/-</sup> mice have increased Lrig1 and decreased pErk**

156 As the stem cell niche is expanded in *Lrig3*<sup>-/-</sup> mice, we next examined if there was any  
157 change in expression of Lrig1, which is an Lrig3 family member, and widely expressed in

158 intestinal stem and progenitor cells(18). While Lrig1 is normally restricted to the crypt-  
159 base, we found that *Lrig3*<sup>-/-</sup> mice have more Lrig1<sup>+</sup> cells in the mid- and upper-crypt (Fig.  
160 4A-D). We quantified the number of Lrig1<sup>+</sup> cells per crypt and found significantly more  
161 Lrig1<sup>+</sup> cells in *Lrig3*<sup>-/-</sup> mice compared to WT mice (p<0.0001, Fig. 4E). We also quantified  
162 Lrig1 expression in the crypts via western blot analysis and confirmed the increase in  
163 Lrig1 we detected in *Lrig3*<sup>-/-</sup> mice (Fig. 4F). As loss of Lrig1 results in changes to growth  
164 factor receptor signaling (18, 26), we next assessed if the over-expression of Lrig1 seen  
165 in *Lrig3*<sup>-/-</sup> mice resulted in cell signaling changes in the crypts. We prioritized analysis of  
166 total and activated Epidermal growth factor receptor (Egfr and pEgfr, respectively), as  
167 these receptors are modulated based on Lrig1 expression (18). We also examined  
168 extracellular signal-related kinase (Erk) expression, as this is a transcriptional activator of  
169 proliferation and differentiation, and promoter of stemness in both the small intestine and  
170 colon (16). We observed no obvious differences in the protein expression of total Egfr  
171 (Fig. 4G-H, K), activated Egfr or total Erk (Fig. 4I-K); however, we consistently observed  
172 decreased expression of phosphorylated Erk (pErk) in the *Lrig3*<sup>-/-</sup> colonic crypts by  
173 western blot analysis (Fig. 4K). These results indicate this common downstream mediator  
174 of mitogen activated kinase signaling is changed in mice lacking *Lrig3*. Taken together,  
175 we observe that *Lrig3* is required for proper Lrig1 expression and appropriate Erk  
176 activation.

## 177 **Discussion**

178 Using our novel *Lrig3*<sup>-/-</sup> mouse, we demonstrate that *Lrig3*<sup>-/-</sup> mice have more cells per  
179 crypt, a greater mucosal area, and longer colons compared to wildtype mice. This  
180 suggests the expression of Lrig3 is required for both the total number of epithelial cells in

181 the mouse colon, as well as establishment of colon length. Further, we show *Lrig3*<sup>-/-</sup> mice  
182 have an Erk-associated expansion of the colonic stem cell compartment, as they harbor  
183 significantly more stem, progenitor, and deep crypt secretory cells.

184 Our research defines the expression domain of Lrig3, in the colon for the first time,  
185 as a novel marker of all colonic epithelial cells. The most well-studied Lrig family member,  
186 Lrig1 (18), is a homologue of Lrig3 with redundant expression patterns in some tissues  
187 (7, 8). In the colon, Lrig1 expression is distinct from that of Lrig3, as it is restricted to the  
188 crypt-base (18, 26). As their expression patterns are distinct in the gastrointestinal tract,  
189 it is likely that Lrig1 and Lrig3 also have unique molecular functions. *In vitro*, we know that  
190 Lrig3 stabilizes the ErbB receptors, whereas Lrig1 promotes ErbB receptor degradation  
191 (18). It is less clear if Lrig3 also promotes stabilization of ErbB receptors *in vivo*; this  
192 observation may be tissue-dependent (3). As with Lrig1, Lrig3 has been evaluated across  
193 many tissue types; and has a significant impact on growth factor receptor pathways. We  
194 show that one common mediator of ErbB and Ras signaling pathways, Erk, is  
195 dysregulated in *Lrig3*<sup>-/-</sup> mice. Through our examination of the ErbB family member, Egfr,  
196 we did not observe any changes to expression or activation of this powerful growth factor  
197 receptor in *Lrig3*<sup>-/-</sup> mice; the impact of Lrig3 loss on other growth cell signaling pathways  
198 represents an important area of future research. Lrig3 also has been shown to regulate  
199 fibroblast growth factor (FGF) receptors which results in changes to neural crest formation  
200 in frog (30) and vascular endothelial growth factor (VEGF) receptors are modulated by  
201 Lrig3 in glioma (17, 31). Both FGF and VEGF pathways are important for the development  
202 and maintenance of the colonic epithelium (9, 21), but it is unknown if Lrig3 modulates  
203 these pathways in this context. This represents an important area of future research.

204           The question of how Lrig3 is regulated may be equally as important as the question  
205 as to what Lrig3 is regulating. Notably, *Lrig3* expression is directly modulated by miRNA-  
206 196a, a microRNA that is upregulated in gastric, colon, breast and pancreatic cancer and  
207 promotes tumorigenesis. In cervical cancer cells, miRNA-196a targets Lrig3 (19) and  
208 improves cell viability. Lrig3 is also regulated at the post-transcriptional level, as there are  
209 reports of a circular form of Lrig3 (*circRNA Lrig3*) that is highly expressed in human  
210 hepatocellular carcinoma (HCC). Detection of blood plasma *circ-Lrig3* is a highly sensitive  
211 and specific diagnostic indicator for HCC (23). Mechanistically, downregulation of  
212 *circRNA Lrig3* represses both the MAPK/ERK and Smad pathways to prevent the  
213 progression of HCC and the loss of *circRNA Lrig3* suppresses proliferation, invasion of  
214 HCC cells *in vitro* and blocks tumor growth of HCC *in vivo* (12, 24). One recent report  
215 gives us a glimpse of the potential role in advanced colon cancer. Using human colon  
216 cancer cell lines, Zang and colleagues were able to show that Lrig3 represses metastasis-  
217 associated cell motility by inhibiting slug via inactivating ERK signaling (29). While the  
218 data on Lrig3 expression in solid tumors is expanding rapidly (5, 6, 12, 17, 23, 24, 29),  
219 the role of Lrig3 in the gastrointestinal tract at the genome, transcriptional and protein  
220 level is largely unknown and represents a valuable avenue for future research for both  
221 normal and cancerous colon tissue.

222           In terms of the requirement for Lrig3 in colon development and homeostasis, we  
223 have two key observations. The first is that *Lrig3*<sup>-/-</sup> mice are born physically smaller and  
224 weigh less than their WT counterparts (11), yet we also consistently observe these mice  
225 to have significantly longer colons at adulthood. While there has been a great deal of  
226 research defining the molecular requirements for small intestinal morphogenesis, and to



227 some extent, for the colon (9, 13), our results clearly signify the importance of studying  
228 *Lrig3* and its role in colon development. While it is beyond the scope of this paper, a clear  
229 next step to understanding how *Lrig3* impacts colon development is to take an *in vivo*,  
230 inducible loss-of-function approach for *Lrig3*, using a timecourse strategy to define the  
231 impact of loss of *Lrig3* on birth weight and colon length.

232         Perhaps the most striking observation from our examination of *Lrig3*<sup>-/-</sup> mice is the  
233 greater number of cells per crypt despite no significant change to proliferation, resulting  
234 in *Lrig3*<sup>-/-</sup> mice having an expanded pool of stem and support cells in the crypt-base. While  
235 colonic epithelial self-renewal has been extensively researched (10) the majority of this  
236 research has been in adult mice, and generally has been assessed during regenerative  
237 phases after tissue injury (27). From these studies, we know the key signaling pathways  
238 that promote stem cell self-renewal and daughter cell differentiation (10). Cellular census  
239 (epithelial cell type and number) is generally consistent from crypt-to-crypt in the distal  
240 colon of both mice and humans. Unfortunately, there is a paucity of research examining  
241 the molecular factors that regulate the number of colon cells and how the crypts arrive at  
242 a homeostatic census (and thus a consistent crypt size) in adulthood. Our data clearly  
243 demonstrate the requirement for proper *Lrig3* expression to yield appropriate crypt cellular  
244 census. Despite the increase in cell number per crypt in *Lrig3*<sup>-/-</sup> mice, we do not observe  
245 an increase in all epithelial cell types. Indeed, we observe a specific increase in the  
246 number of cells in the stem cell compartment at the crypt-base, suggesting that *Lrig3* is  
247 critical for establishing the size of the stem cell compartment during development. In  
248 future experiments, it will be important to test this hypothesis directly, either by  
249 overexpression of *Lrig3* or through forced, wide-spread regeneration of colon crypts in

250 *Lrig3*<sup>-/-</sup> mice. In the latter example, induction of acute injury to the adult *Lrig3*<sup>-/-</sup> colon to  
251 spur crypt renewal will be instructive in understanding how *Lrig3*<sup>-/-</sup> mice arrive at this  
252 aberrant state of homeostasis. Taken together, our results signify the importance of  
253 studying *Lrig3* and its role in cellular census and colon development.

## 254 **Experimental Procedures**

255 **Generating *Lrig3*<sup>-/-</sup> mice** – The 129 *Lrig3* BAC clone (bMQ-129G9) was obtained from  
256 Sanger Institute. The *Lrig3* targeting construct which disrupts exons 4-12 of the *Lrig3*  
257 locus was generated by BAC recombineering (14). The gene disruption strategy, null  
258 allele sequence and location of PCR primers is presented in Supplemental Figure 1. PCR  
259 primer sequences are listed in Supplemental Table 1. ES cell electroporation and  
260 subsequent blastocyst injections were performed by the Transgenic Mouse/ES Cell  
261 Shared Resource at Vanderbilt University.

262 **Mice** – C57BL/6 and *Lrig3*<sup>-/-</sup> mice were housed in a specific pathogen-free environment  
263 under controlled light cycle conditions, fed standard rodent lab chow, and provided water  
264 *ad libitum*. All procedures were approved and performed in accordance with the University  
265 of Oregon Institutional Animal Care and Use Committee. All mice were used at 6-10  
266 weeks and mouse sex was mixed male to female at a roughly 50% ratio of each. All mice  
267 were sacrificed by cervical dislocation. At time of sacrifice, colons were removed, flushed  
268 with ice cold PBS and immediately measured using a ruler to obtain colon length, and  
269 then bifurcated.

270 **Tissue Preparation for Staining** – Tissue for paraffin and frozen block preparation were  
271 pinned onto a wax surface, fixed using 4% paraformaldehyde (PFA) for one hour (tissue

272 imaged in Fig1G-J were fixed in 4% PFA overnight), on a shaker at room temperature.  
273 They were then washed three times (five minutes each) in PBS. For frozen blocks, tissue  
274 was submerged 30% sucrose in PBS overnight at 4°C and embedded in optimal tissue  
275 compound (OCT) for subsequent sectioning. For paraffin blocks, tissue was incubated in  
276 70% ethanol and dehydrated in increasing alcohol baths and embedded in paraffin wax.  
277 All slides were sectioned at 7µm, (unless stated otherwise), and stained according to  
278 procedures below.

279 **Colonic Crypt Protein Isolation** – Bifurcated colons were cut into ~ 1cm pieces and  
280 incubated in ice cold 2mM EDTA and 0.5mM DTT PBS buffer, washed in PBS, and  
281 incubated 2mM EDTA buffer at 37°C. Tissue underwent vigorous lateral shaking to  
282 release crypts from submucosa, suspension was decanted, and shaking was repeated  
283 three times. The presence of single crypts is verified under a compound microscope and  
284 residual submucosal tissue is removed. The final collection of crypt suspensions was  
285 centrifuged at 500xg, cell pellet was then resuspended in Pierce RIPA buffer  
286 (ThermoFisher) with protease (½ tablet, Pierce Protease Inhibitor Mini tablets, EDTA-  
287 free, ThermoFisher) and phosphatase inhibitor (½ tablet PhosSTOP EASYpack, Roche),  
288 homogenized using an 18-gauge needle, and centrifuged at maximum speed. The  
289 supernatant was removed, and protein concentration determined using Pierce BCA kit  
290 (ThermoFisher).

291 **Morphometric Analysis** – Mucosal area and nuclei per crypt were quantified using  
292 paraffin embedded tissue and stained with Hematoxylin and Eosin (VWR). Images and  
293 measurements were obtained on a Nikon Eclipse/Ds-Ri2. To quantify the mucosal area  
294 we measured 10 images per animal (n=4 mice per genotype) using the Nikon NIS-

295 Elements measurement tool. We measured the area of colonic epithelium by drawing  
296 lines across the basement membrane of the epithelium, along the sides, and across the  
297 luminal edge. To quantify the nuclei per crypt we used Hematoxylin and Eosin-stained  
298 paraffin slides and counted total nuclei per crypt in 10 images per animal (n=4 mice per  
299 genotype).

300 **Antibodies and Staining Procedure** – Frozen tissue slides were washed in PBS three  
301 times (three minutes each), blocked in 1% bovine serum albumin (BSA) and 0.03% Triton  
302 X-100 suspended in PBS for 1 hour. Antibodies were diluted in this blocking buffer at  
303 concentrations listed in Supplemental Table 1, applied to the sections and sections were  
304 incubated overnight at 4°C. Slides were then washed in PBS three times (three minute  
305 each) and incubated with secondary antibodies at 1:500 in the same blocking buffer as  
306 above, for one hour at room temperature. Lastly, slides were washed in PBS for three  
307 minutes, then washed in PBS plus DAPI (1:10,000) for five minutes, and finally washed  
308 in PBS for three minutes. Slides were mounted using an n-propyl gallate/glycerol solution.  
309 Paraffin slides underwent conventional deparaffinization in xylenes and rehydration via  
310 ethanol washes and water, followed by antigen retrieval in a 1x Citrate buffer  
311 (ThermoFisher) in a pressure cooker for one hour. Antibody catalog information and  
312 concentrations used are listed in Supplemental Table 2.

313 **Western Blot** – Protein was diluted in a Laemmli buffer with 5%  $\beta$ -mercaptoethanol and  
314 boiled at 95°C for five minutes. 25 $\mu$ g of protein was loaded per lane into an SDS-PAGE  
315 gel (Bio-Rad Mini-Protean pre-cast gels 4-20%) and gels were run at 160V for  
316 approximately 90 minutes. Protein was transferred from the gel to a PVDF membrane  
317 overnight at 55V at 4°C. Membranes were blocked in either 5% dry milk or 5% BSA in

318 PBS for one hour and incubated in primary antibody overnight at 4°C. Membranes are  
319 then incubated in HRP-conjugated secondary antibodies at room temperature for one  
320 hour. ECL reagent (GE Healthcare) was then applied and subsequent images were  
321 captured on a LI-COR Odyssey Fc Imaging System. For quantification of protein levels  
322 of target proteins,  $\beta$ -tubulin was used as a normalization control (n=3 mice per genotype).

323 ***In Situ* hybridization** – *In situ* hybridization was conducted using RNAscope Multiplex  
324 Fluorescent Reagent Kit v2 (Advanced Cell Diagnostics #323110) according to  
325 manufacturer protocols for fixed, frozen tissue sample preparation protocol (ACD TN  
326 320535 Rev A, 323100-USM). Briefly, 15um frozen sections were washed briefly in PBS,  
327 boiled for 5 minutes in 1x Target Retrieval buffer, followed by two brief washes in ddH<sub>2</sub>O  
328 and one in 95% EtOH. Slides were dried then dammed with an ImmEdge hydrophobic  
329 barrier pen, then incubated with Protease III for 15 minutes at 40°C. Slides were washed  
330 briefly in ddH<sub>2</sub>O, then incubated at 40°C in sequence with Probe-Mm-Lgr5 (312171) or or  
331 Mm-Lrig3 probe (310541) (2hr), AMP 1 (30 min), AMP 2 (30 min), AMP 3 (15 min), HRP-  
332 C1 (15 min), Opal-570 TSA (30 min, 1:1000), with two two-minute washes with 1x Wash  
333 Buffer between hybridization steps. Slides were counterstained with DAPI and mounted  
334 with N-propyl gallate mounting medium.

335 **Fluorescence microscopy: image acquisition and analysis** – Images for  
336 quantification of all immunofluorescent and RNAscope images were obtained using a  
337 Nikon Eclipse/Ds-Ri2 and NIS Elements software tools. Lrig3 antibody was visualized  
338 using confocal microscopy on a Zeiss LSM-880 system. Images were false-colored in  
339 Adobe Photoshop. All image analysis and quantification was performed in a double-blind  
340 fashion and statistical comparisons were analyzed using GraphPad Prism software.

341 Quantification of all images (total “n” and counting metrics) are designated in each figure  
342 legend, however there were two sets of images analyzed with different criteria and we  
343 explain them here. For the quantification of *Lgr5* expression, images were acquired and  
344 binned according to low- (<6 puncta per cell), mid- (6-14 puncta per cell), and high (15<  
345 puncta per cell) expression levels. Example images are shown in Fig. 3E. For Reg4  
346 quantification, we separated each colonic crypt in half (upper and lower regions) and  
347 counted the positive cells in each region. Example images are shown in Fig. H and J, with  
348 the dotted white line separating upper from lower.

### 349 **Figure Legends**

350 **Figure 1. *Lrig3* expression in the colonic epithelium.** A. Schematic depicting knockout  
351 of exons 4-12 in the *Lrig3*<sup>-/-</sup> mice, compared to WT mice. Blue antibody drawing indicates  
352 where *Lrig3* antibody (panels F, G-J) antigen is located. Blue line indicates where *Lrig3*  
353 RNA SCOPE probe (panels B-E) is located. B-C. Representative epifluorescence RNA  
354 SCOPE images of colonic tissue cross sections indicating *Lrig3* transcripts (green) are  
355 located largely within the colonic epithelial compartment in wildtype mice. In *Lrig3*<sup>-/-</sup> mice  
356 (D-E), RNA SCOPE signal (green) is lost (n=3 mice/genotype, 16 images/mouse). F.  
357 Western blot comparing *Lrig3* antibody reactivity in wildtype and *Lrig3*<sup>-/-</sup> colonic epithelial  
358 cell isolation lysates (n=3). G-J. Representative images from a single confocal slice  
359 illustrating *Lrig3* antibody reactivity with wildtype (G-H) colonic tissue (green) cross-  
360 sections (n=3 mice/genotype, 10 images/mouse). Background fluorescence observed in  
361 *Lrig3*<sup>-/-</sup> (I-J). Scale bars indicate 50um. Nuclei in B-E and G-J are depicted in magenta. B,  
362 D, G and H are single channel representations of the green color shown in C, E, H and J,  
363 respectively.

364 **Figure 2. *Lrig3*<sup>-/-</sup> mice have expanded mucosal area.** A. Scatter plot indicating adult  
365 *Lrig3*<sup>-/-</sup> mice have significantly longer colons, as measured from cecum to rectum,  
366 compared to wildtype mice (n=10 mice/genotype). B. Scatter plot indicating adult *Lrig3*<sup>-/-</sup>  
367 mice have significantly more mucosal area in their colon, compared to wildtype mice (n=4,  
368 10 images/mouse). C-D. Representative colon cross sections of wildtype and *Lrig3*<sup>-/-</sup> mice  
369 that have been stained with hematoxylin and eosin. Dashed line indicates the area  
370 measured for mucosal area. E. Scatter plot indicating adult *Lrig3*<sup>-/-</sup> mice have more nuclei  
371 per crypt compared to WT mice (n=4 mice/genotype, 10 images/mouse). F. Scatter plot  
372 indicating no significant change in proliferation (Ki67) between *Lrig3*<sup>-/-</sup> and wildtype mice  
373 (n=4 mice/genotype, 10 images/mouse, 152 crypts/genotype). G-J. Representative  
374 images of colonic tissue sections with anti-Ki67 antibody reactivity in *Lrig3*<sup>-/-</sup> (I-J) and  
375 wildtype (G-H) adult animals. Nuclei in H and J are depicted in magenta. In all plots, error  
376 bars indicate standard deviation from the mean. Significance was determined using an  
377 unpaired t-test where a significant difference between the groups is represented by an  
378 asterisk (\*) when p<0.05. When p<.01., the data have been labeled with two asterisks  
379 (\*\*), and by (\*\*\*\*) when p<0.0001. Scale bar in C-D indicates 50um. All breaks in the Y  
380 axes are shown with parallel lines. G and I are single channel representations of the green  
381 color shown in H and J, respectively.

382 **Figure 3. Expansion of the stem cell niche.** A-D. Representative RNA SCOPE images  
383 of colonic tissue cross sections indicating *Lgr5* transcripts (green) between wildtype (A-  
384 B) and *Lrig3*<sup>-/-</sup> (C-D) mice. E. Representative images of low, mid, and high *Lgr5*<sup>+</sup> transcript  
385 expression. F. Scatter plot indicating *Lrig3*<sup>-/-</sup> mice have significantly more *Lgr5*<sup>+</sup> mid and  
386 high cell transcript expression compared to wildtype mice (n=3 mice/genotype, 4

387 images/mouse). G-J. Representative images of colonic tissue sections comparing  
388 expression of Reg4 antibody reactivity. Dotted line depicts the center of the crypt where  
389 they were marked and quantified crypt upper half and lower half. K. Scatter plot indicating  
390 an increase in Reg4<sup>+</sup> cells, in the lower half of the colonic crypt, in *Lrig3*<sup>-/-</sup> mice compared  
391 to wildtype mice (n=7 mice/genotype, 7 images/mouse). L. Scatter plot indicating no  
392 change in Reg4<sup>+</sup> cells in the upper portion of the colonic crypt of *Lrig3*<sup>-/-</sup> mice compared  
393 to wildtype mice (n=7 mice/genotype, 7 images/mouse). Nuclei in B-E are depicted in  
394 magenta. Scale bar indicates 50um. In all plots, error bars indicate standard deviation  
395 from the mean. Significance was determined using an unpaired t-test where a significant  
396 difference between the groups is represented by an asterisk (\*) when p<0.05. When  
397 p<.01., the data have been labeled with two asterisks (\*\*), when p<0.0001, the data have  
398 been labeled with four asterisks (\*\*\*\*). A, C, G and I are single channel representations  
399 of the green color shown in B, D, H and J, respectively.

400

401 **Figure 4. Expression of Lrig1 is expanded in *Lrig3*<sup>-/-</sup> mice.** A-D. Representative  
402 images of colonic tissue sections comparing the expression of Lrig1 between wildtype (A-  
403 B) and *Lrig3*<sup>-/-</sup> (C-D) mice. In A and C, Lrig1 (white) is detected at the cell membrane of  
404 cells located in the crypt base. In B and D, Lrig1 (green) is shown in the context of all cells  
405 in the crypt (magenta). E. Scatter plot indicating significantly more Lrig1<sup>+</sup> cells in the  
406 colonic crypt of *Lrig3*<sup>-/-</sup> mice compared to wildtype (n=4 mice/genotype, 10  
407 images/mouse). F. Western blot comparing Lrig1 antibody reactivity in wildtype and *Lrig3*  
408 <sup>-/-</sup> colonic tissue cell lysates (n=3). G-J. Representative images of colonic tissue sections  
409 comparing the expression of pEgfr (I and J, green) and Egfr (G-H, green) between



410 wildtype and *Lrig3*<sup>-/-</sup> mice. K. Representative western blots comparing protein expression  
411 for Egfr, Erk1/2, and pErk1/2 in wildtype and *Lrig3*<sup>-/-</sup> colonic tissue cell lysates (n=3).  
412 Nuclei in G-J are depicted in magenta. Scale bars indicate 50um. Significance in scatter  
413 plot was determined using an unpaired t- test where a significant difference between the  
414 groups is represented by an asterisk (\*\*\*\*) when p<0.0001. A and C are single channel  
415 representations of the green color shown in B and D respectively.

416

417 **Supplemental Figure 1. Wildtype and *Lrig3*<sup>-/-</sup> allele map, sequence, and PCR**  
418 **screening of mice.** A-B. Schematic representation of the wildtype and *Lrig3*<sup>-/-</sup> genes.  
419 Disruption of *Lrig3* was achieved through the removal of exons 4-12, joining the third and  
420 twelfth intron. B. The intervening remaining sequence (650bp) is shown. C. Confirmatory  
421 PCR analysis of the wildtype *Lrig3* allele, using primers that are located upstream (5') and  
422 downstream (3') of the fourth exon, and generate 1.2kb PCR product. *Lrig3*<sup>-/-</sup> mice do not  
423 generate a PCR product, as they lack the 3' site. D. Confirmatory PCR analysis of the null  
424 *Lrig3* allele, using primers that are located upstream (5') of the fourth exon and  
425 downstream (3') of the twelfth exon, generates a 650bp product in the null mice. Wildtype  
426 mice do not generate a PCR product under standard conditions, as that region is 10kb in  
427 length. *Lrig3* mutant heterozygous and homozygous mice are viable and fertile. PCR  
428 primer sequences are listed in Supplemental Table 1.

429 **Supplemental Figure 2. Differentiated Cell marker expression in *Lrig3*<sup>-/-</sup> and**  
430 **wildtype colons.** A-D. Representative images of Vil-1 expression (green) in the  
431 absorptive cells of the colonic epithelium in wildtype (A-B) *Lrig3*<sup>-/-</sup> colons (C-D). B' and D'.  
432 Enlarged images of Vil-1 expression shown in wildtype (B and B') and *Lrig3*<sup>-/-</sup> (D and D').

433 E-H. Representative images of Dclk1 expression (green) in tuft cells of colonic epithelium  
434 in wildtype (E-F) *Lrig3*<sup>-/-</sup> (G-H) colons. I. Scatter plot indicating no significant change in  
435 Dclk1<sup>+</sup> cells in the colonic crypts of *Lrig3*<sup>-/-</sup> compared to wildtype mice (n=4, 10  
436 images/mouse). J-M. representative images of ChgA expression (green) in  
437 neuroendocrine cells of the colonic epithelium in wildtype (J-K) and *Lrig3*<sup>-/-</sup> (L-M) colons.  
438 N. Scatter plot indicating no significant change in ChgA<sup>+</sup> cells in the colonic epithelium of  
439 *Lrig3*<sup>-/-</sup> compared to wildtype mice (n=4, 10 images/mouse). For both panels, nuclei in are  
440 depicted in magenta and the scale bar indicates 50um.

441

442

#### 443 Supplemental Table 1

| WT and <i>Lrig3</i> <sup>-/-</sup> primers |                               |
|--------------------------------------------|-------------------------------|
| WT & <i>Lrig3</i> <sup>-/-</sup> 5' primer | 5' gctaaagcagccacagagtggta 3' |
| WT 3' primer                               | 5' ctgtgccctcaaactgtcaa 3'    |
| <i>Lrig3</i> <sup>-/-</sup> 3' primer      | 5' ttccctggactggtaggtagctc 3' |

444

#### 445 Supplemental Table 2

| Antibody | Company       | Product# | Concentration            |
|----------|---------------|----------|--------------------------|
| Lrig3    | US Biological | 151911   | 1:250(IF)<br>1:300 (WB)  |
| Lrig1    | R&D Systems   | AF3688   | 1:500 (IF)<br>1:300 (WB) |
| Ki67(PE) | eBiosciences  | SolA15   | 1:100 (IF)               |
| Egfr     | abcam         | ab52894  | 1:500 (IF)<br>1:1000(WB) |

|               |                           |          |             |
|---------------|---------------------------|----------|-------------|
| pEgfr (Y1068) | abcam                     | 200709   | 1:400 (IF)  |
| Erk           | Bioss                     | BS-0022R | 1:1000 (WB) |
| pErk          | Cell Signaling Technology | 4370S    | 1:1000 (WB) |
| Reg4          | R&D Systems               | AF1379   | 1:100 (IF)  |

446

## 447 **References**

- 448 1. **Abousoliman I, Reyer H, Oster M, Murani E, Mohamed I, Wimmers K.**  
449 Genome-Wide Analysis for Early Growth-Related Traits of the Locally Adapted  
450 Egyptian Barki Sheep. *Genes (Basel)* 12, 2021. doi: 10.3390/genes12081243.
- 451 2. **Abraira VE, del Rio T, Tucker AF, Slonimsky J, Keirnes HL, Goodrich L V.**  
452 Cross-repressive interactions between Lrig3 and Netrin1 shape the architecture of  
453 the inner ear. *Development* 135: 4091–4099, 2008. doi: 10.1242/dev.029330.
- 454 3. **Abraira VE, Satoh T, Fekete DM, Goodrich L V.** Vertebrate Lrig3-ErbB  
455 interactions occur in vitro but are unlikely to play a role in Lrig3-dependent inner  
456 ear morphogenesis. *PLoS One* 5, 2010. doi: 10.1371/journal.pone.0008981.
- 457 4. **Barker N, van Es JH, Kuipers J, Kujala P, van den Born M, Cozijnsen M,**  
458 **Haegebarth A, Korving J, Begthel H, Peters PJ, Clevers H.** Identification of  
459 stem cells in small intestine and colon by marker gene Lgr5 [Online]. *Nature* 449:  
460 1003, 2007. <http://dx.doi.org/10.1038/nature06196>.
- 461 5. **Cai MJ, Xie RF, Han L, Chen RD, Wang BF, Ye F, Guo DS, Lei T.** Effect of  
462 RNAi-mediated LRIG3 gene silencing on proliferation of glioma GL15 cells and  
463 expression of PCNA and Ki-67. *Chin J Cancer* 28: 1–4, 2009.
- 464 6. **Chen Y, Wang Q, Wang M, Li M.** Overexpressed LRIG3 gene ameliorates  
465 prostate cancer through suppression of cell invasion and migration. *Int J Biol*  
466 *Macromol* 124: 1–9, 2019. doi: <https://doi.org/10.1016/j.ijbiomac.2018.11.028>.
- 467 7. **De Vincenti AP, Alsina FC, Ferrero Restelli F, Hedman H, Ledda F, Paratcha**  
468 **G.** Lrig1 and Lrig3 cooperate to control Ret receptor signaling, sensory axonal  
469 growth and epidermal innervation. *Development* 148, 2021. doi:  
470 10.1242/dev.197020.
- 471 8. **del Rio T, Nishitani AM, Yu W-M, Goodrich L V.** In Vivo Analysis of Lrig Genes  
472 Reveals Redundant and Independent Functions in the Inner Ear [Online]. *PLOS*  
473 *Genet* 9: e1003824, 2013. <https://doi.org/10.1371/journal.pgen.1003824>.
- 474 9. **Dessimoz J, Opoka R, Kordich JJ, Grapin-Botton A, Wells JM.** FGF signaling  
475 is necessary for establishing gut tube domains along the anterior–posterior axis in  
476 vivo. *Mech Dev* 123: 42–55, 2006. doi: <https://doi.org/10.1016/j.mod.2005.10.001>.
- 477 10. **Gehart H, Clevers H.** Tales from the crypt: new insights into intestinal stem cells.

- 478 *Nat Rev Gastroenterol Hepatol* 16: 19–34, 2019. doi: 10.1038/s41575-018-0081-  
479 y.
- 480 11. **Hellström M, Ericsson M, Johansson B, Faraz M, Anderson F, Henriksson R,**  
481 **Nilsson SK, Hedman H.** Cardiac hypertrophy and decreased high-density  
482 lipoprotein cholesterol in Lrig3-deficient mice [Online]. *Am J Physiol - Regul Integr*  
483 *Comp Physiol* 310: R1045, 2016.  
484 <http://ajpregu.physiology.org/content/310/11/R1045.abstract>.
- 485 12. **Hu X, Zhou K, Cao S, Zhu H, Xie K.** Circ\_lrig3 contributes to the progression of  
486 hepatocellular carcinoma by elevating rnf38 via sponging mir-449a. *Gen Physiol*  
487 *Biophys* 40, 2021. doi: 10.4149/gpb\_2020044.
- 488 13. **Kwon O, Han T-S, Son M-Y.** Intestinal Morphogenesis in Development,  
489 Regeneration, and Disease: The Potential Utility of Intestinal Organoids for  
490 Studying Compartmentalization of the Crypt-Villus Structure. *Front cell Dev Biol* 8:  
491 593969, 2020. doi: 10.3389/fcell.2020.593969.
- 492 14. **Liu P, Jenkins NA, Copeland NG.** A highly efficient recombineering-based  
493 method for generating conditional knockout mutations. *Genome Res* 13: 476–  
494 484, 2003. doi: 10.1101/gr.749203.
- 495 15. **Metodiev S, Thekkoot DM, Young JM, Onteru S, Rothschild MF, Dekkers**  
496 **JCM.** A whole-genome association study for litter size and litter weight traits in  
497 pigs. *Livest Sci* 211, 2018. doi: 10.1016/j.livsci.2018.03.004.
- 498 16. **Osaki LH, Gama P.** MAPKs and Signal Transduction in the Control of  
499 Gastrointestinal Epithelial Cell Proliferation and Differentiation. *Int J Mol Sci* 14:  
500 10143–10161, 2013. doi: 10.3390/ijms140510143.
- 501 17. **Peng C, Chen H, Li Y, Yang H, Qin P, Ma B, Duan Q, Wang B, Mao F, Guo D.**  
502 LRIG3 Suppresses Angiogenesis by Regulating the PI3K/AKT/VEGFA Signaling  
503 Pathway in Glioma. *Front Oncol* 11: 54, 2021. doi: 10.3389/fonc.2021.621154.
- 504 18. **Powell AE, Wang Y, Li Y, Poulin EJ, Means AL, Washington MK,**  
505 **Higginbotham JN, Juchheim A, Prasad N, Levy SE, Guo Y, Shyr Y, Aronow**  
506 **BJ, Haigis KM, Franklin JL, Coffey RJ.** The pan-ErbB negative regulator, Lrig1,  
507 is an intestinal stem cell marker that functions as a tumor suppressor. *Cell* 149:  
508 146–158, 2012. doi: 10.1016/j.cell.2012.02.042.
- 509 19. **Qiu Y, Han Q, Lu H, Shi C.** miR-196a targeting LRIG3 promotes the proliferation  
510 and migration of cervical cancer cells. *Cell Mol Biol* 66, 2020. doi:  
511 10.14715/cmb/2020.66.7.27.
- 512 20. **Sasaki N, Sachs N, Wiebrands K, Ellenbroek SIJ, Fumagalli A, Lyubimova A,**  
513 **Begthel H, Van Born M Den, Van Es JH, Karthaus WR, Li VSW, López-**  
514 **Iglesias C, Peters PJ, Van Rheenen J, Van Oudenaarden A, Clevers H.** Reg4+  
515 deep crypt secretory cells function as epithelial niche for Lgr5+ stem cells in  
516 colon. *Proc Natl Acad Sci U S A* 113: E5399–E5407, 2016. doi:  
517 10.1073/pnas.1607327113.

- 518 21. **Schlieve CR, Mojica SG, Holoyda KA, Hou X, Fowler KL, Grikscheit TC.**  
519 Vascular Endothelial Growth Factor (VEGF) Bioavailability Regulates  
520 Angiogenesis and Intestinal Stem and Progenitor Cell Proliferation during  
521 Postnatal Small Intestinal Development [Online]. *PLoS One* 11: e0151396, 2016.  
522 <https://doi.org/10.1371/journal.pone.0151396>.
- 523 22. **Simion C, Prieto MEC, Sweeney C.** The LRIG family – enigmatic regulators of  
524 growth factor receptor signaling. *Endocr Relat Cancer* 21: R431–R443, 2014. doi:  
525 10.1530/ERC-14-0179.
- 526 23. **Sun H, Zhai J, Zhang L, Chen Y.** CircRNA LRIG3 knockdown inhibits  
527 hepatocellular carcinoma progression by regulating miR-223-3p and MAPK/ERK  
528 pathway. .
- 529 24. **Sun S, Gao J, Zhou S, Li Y, Wang Y, Jin L, Li J, Liu B, Zhang B, Han S, Ding**  
530 **H, Li X.** A novel circular RNA circ-LRIG3 facilitates the malignant progression of  
531 hepatocellular carcinoma by modulating the EZH2/STAT3 signaling. *J Exp Clin*  
532 *Cancer Res* 39: 252, 2020. doi: 10.1186/s13046-020-01779-5.
- 533 25. **Wang Y, Shi C, Lu Y, Poulin EJ, Franklin JL, Coffey RJ.** Loss of Lrig1 leads to  
534 expansion of Brunner glands followed by duodenal adenomas with gastric  
535 metaplasia. *Am J Pathol* 185: 1123–34, 2015. doi: 10.1016/j.ajpath.2014.12.014.
- 536 26. **Wong VWY, Stange DE, Page ME, Buczacki S, Wabik A, Itami S, van de**  
537 **Wetering M, Poulosom R, Wright NA, Trotter MWB, Watt FM, Winton DJ,**  
538 **Clevers H, Jensen KB.** Lrig1 controls intestinal stem cell homeostasis by  
539 negative regulation of ErbB signalling. *Nat Cell Biol* 14: 401–408, 2012. doi:  
540 10.1038/ncb2464.
- 541 27. **Yui S, Azzolin L, Maimets M, Pedersen MT, Fordham RP, Hansen SL, Larsen**  
542 **HL, Guiu J, Alves MRP, Rundsten CF, Johansen J V, Li Y, Madsen CD,**  
543 **Nakamura T, Watanabe M, Nielsen OH, Schweiger PJ, Piccolo S, Jensen KB.**  
544 YAP/TAZ-Dependent Reprogramming of Colonic Epithelium Links ECM  
545 Remodeling to Tissue Regeneration. *Cell Stem Cell* 22: 35-49.e7, 2018. doi:  
546 10.1016/j.stem.2017.11.001.
- 547 28. **Zeng K, Chen X, Xu M, Liu X, Li C, Xu X, Pan B, Qin J, He B, Pan Y, Huiling**  
548 **S, Xu T, Wang S.** LRIG3 represses cell motility by inhibiting slug via inactivating  
549 ERK signaling in human colorectal cancer. *IUBMB Life* : 1–11, 2020. doi:  
550 10.1002/iub.2262.
- 551 29. **Zeng K, Chen X, Xu M, Liu X, Li C, Xu X, Pan B, Qin J, He B, Pan Y, Huiling**  
552 **S, Xu T, Wang S.** LRIG3 represses cell motility by inhibiting slug via inactivating  
553 ERK signaling in human colorectal cancer. *IUBMB Life* : 1–11, 2020. doi:  
554 10.1002/iub.2262.
- 555 30. **Zhao H, Tanegashima K, Ro H, Dawid IB.** Lrig3 regulates neural crest formation  
556 in *Xenopus* by modulating Fgf and Wnt signaling pathways. *Development* 135:  
557 1283–1293, 2008. doi: 10.1242/dev.015073.
- 558 31. **Zhou H, Cao J, Yang F, Fan D, Li H, Fan T, Sun P.** Member Domain 3 (LRIG3)

559           Activates Hypoxia-Inducible Factor-1  $\alpha$  /Vascular Endothelial Growth Factor (HIF-  
560           1  $\alpha$  /VEGF) Pathway to Inhibit the Growth of Bone Marrow Mesenchymal Stem  
561           Cells in Glioma . *J Biomater Tissue Eng* 11, 2021. doi: 10.1166/jbt.2021.2629.

562   32.   Genepaint [Online]. [date unknown]. <https://gp3.mpg.de>.

563

564

565



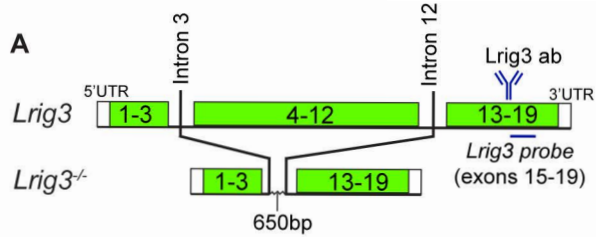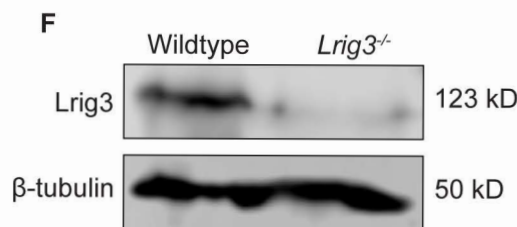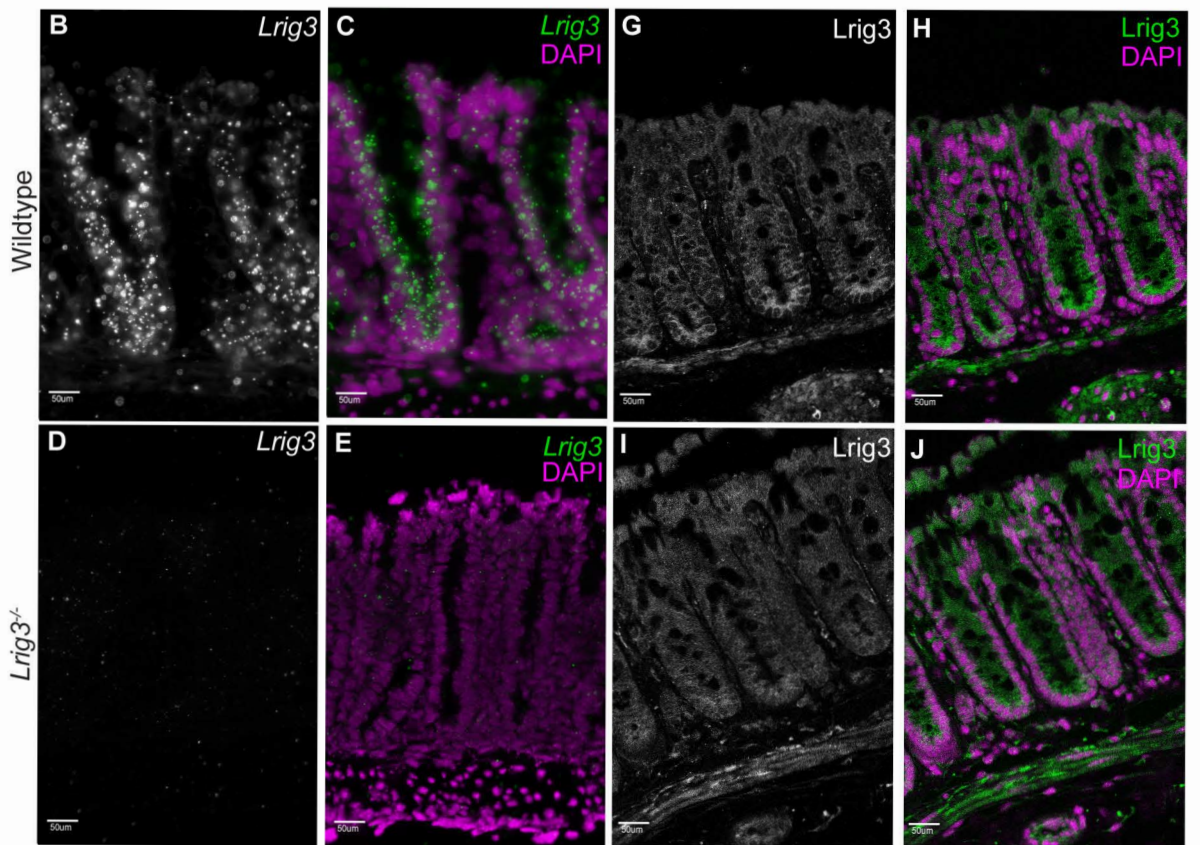

Figure 2

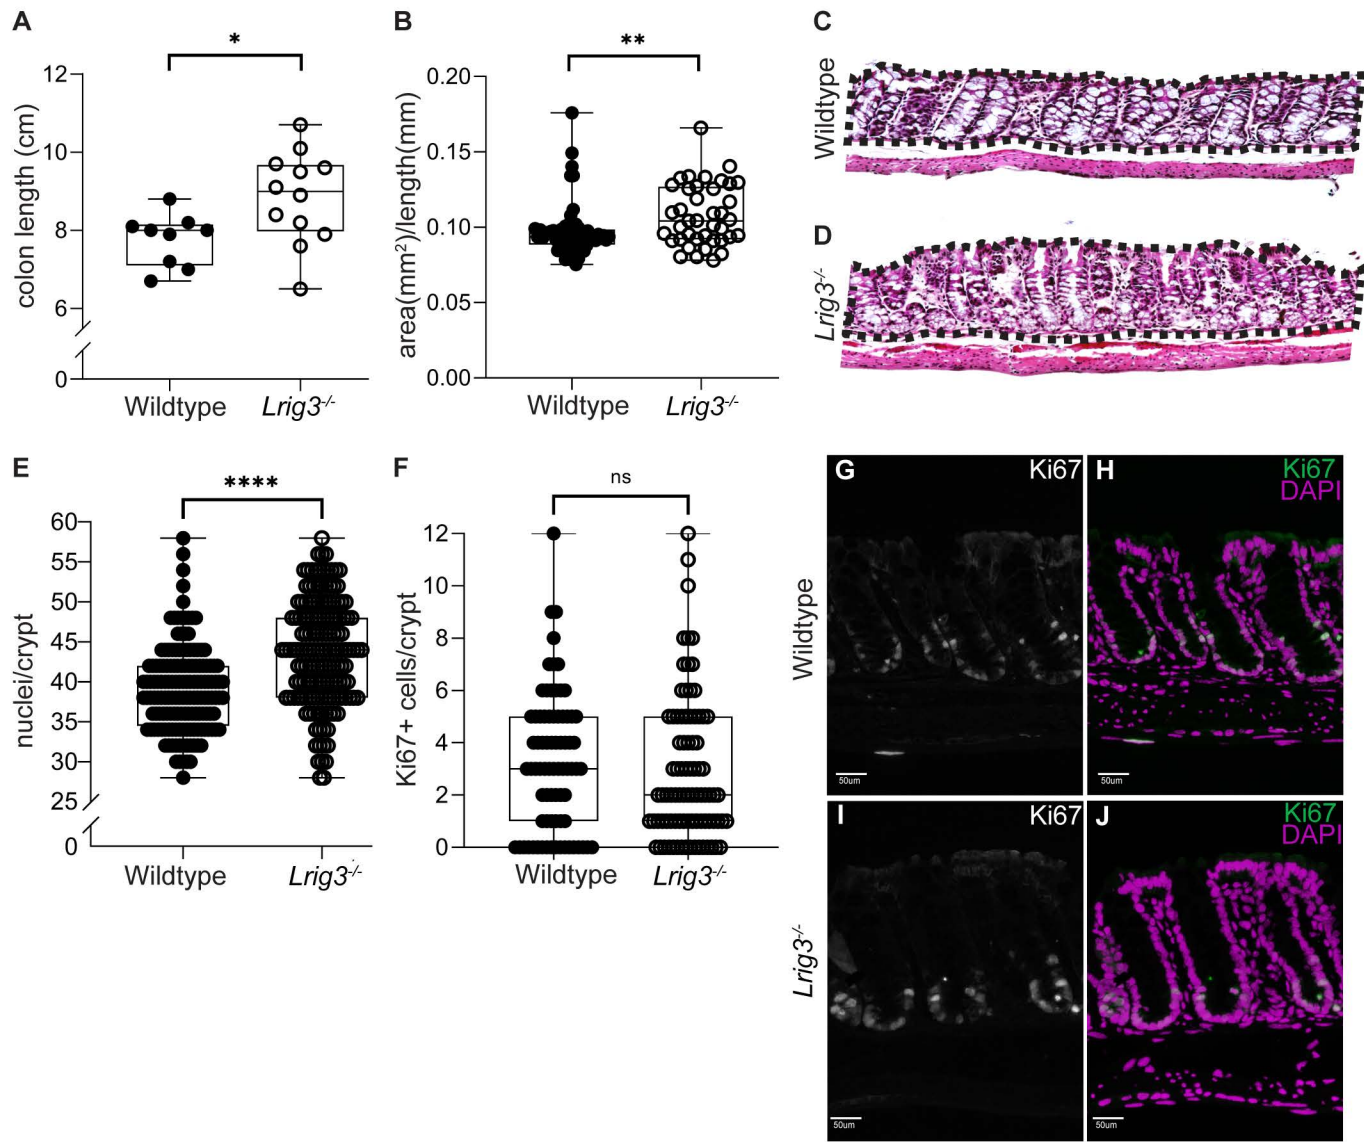



Figure 3

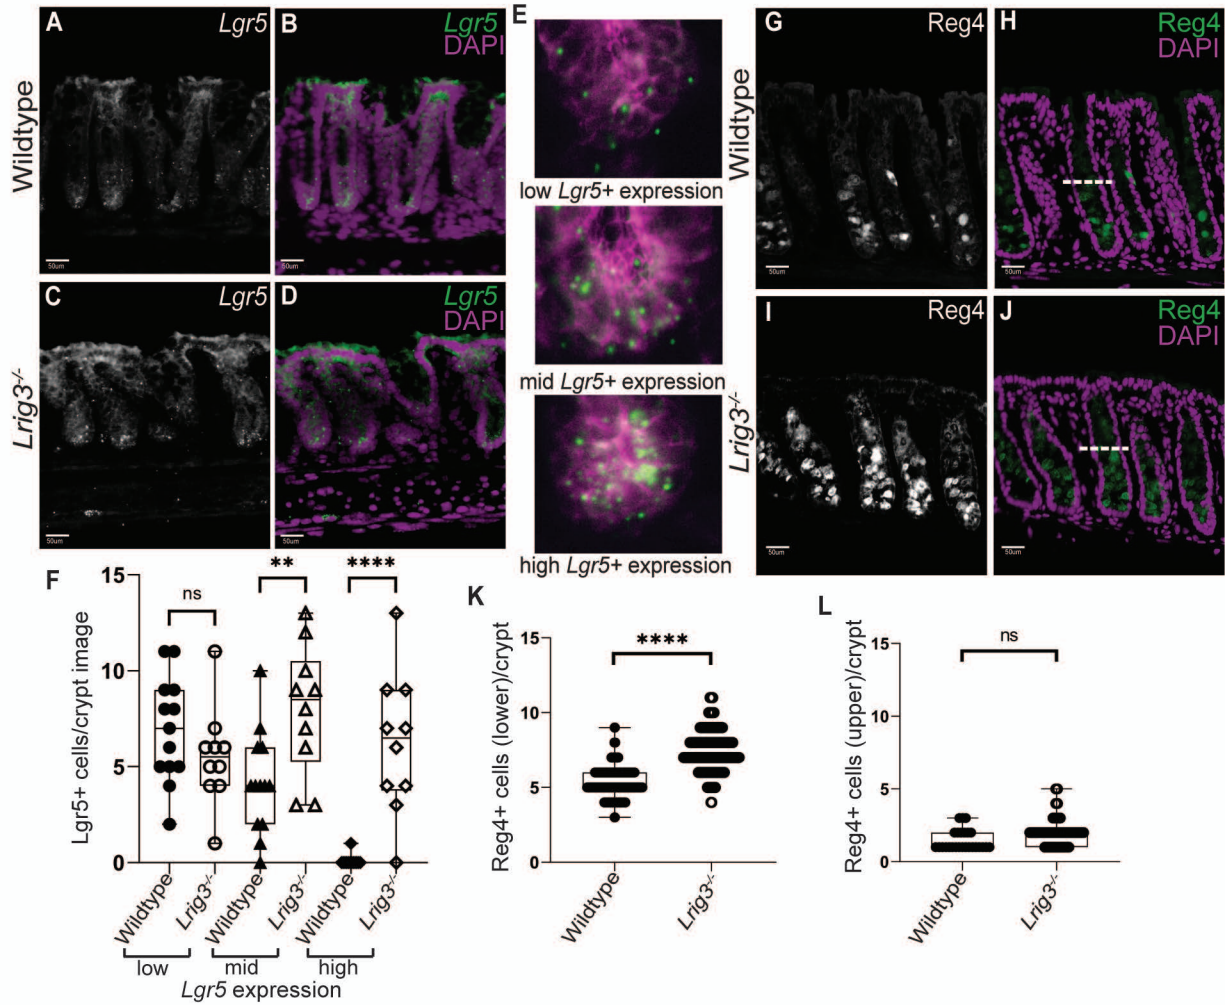

Figure 4

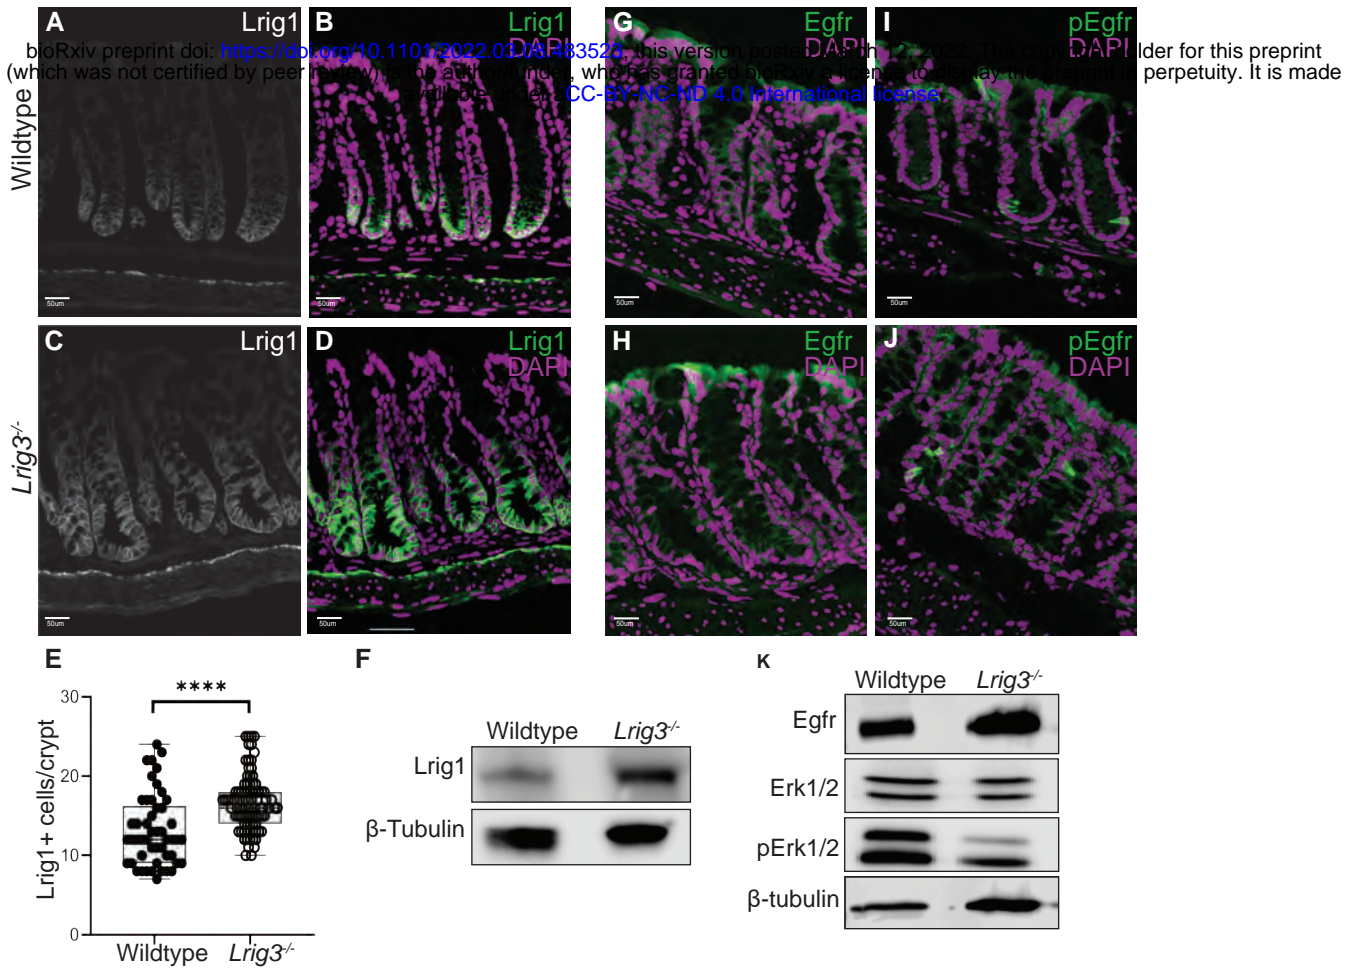

Source: https://www.biorxiv.org/content/biorxiv/early/2022/03/12/2022.03.08.483523.full.pdf
